# Supplementary material for: Soot growth by monodisperse particle dynamics model coupled with Computational Fluid Dynamics
Source: Copernicus journal article supplement (doi:10.5194/ar-2025-40), 2025-12-15
Supplement: Supplementary file 1 [file ar-2025-40-supplement.pdf]

## Supplementary Information

# Soot growth by monodisperse particle dynamics model coupled with Computational Fluid Dynamics

Arash Fakharnezhad<sup>1</sup>, Joseph D. Berry<sup>1</sup>, Eirini Goudeli<sup>1,\*</sup>

*<sup>1</sup>Department of Chemical Engineering, The University of Melbourne, Parkville, Melbourne  
VIC, Australia*

Ph. +61 (0) 3 8344 5798

Submitted to:

Aerosol Research

\*Corresponding author: [eirini.goudeli@unimelb.edu.au](mailto:eirini.goudeli@unimelb.edu.au)

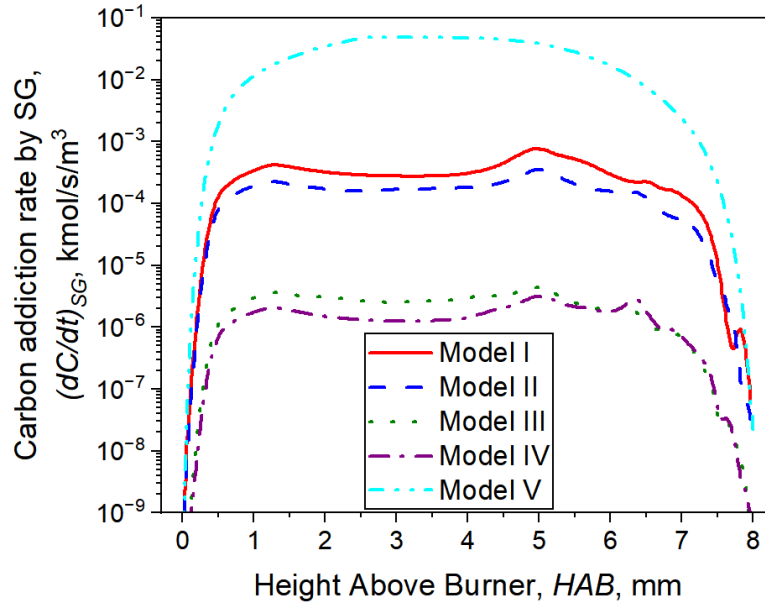

Figure S1: Variation of carbon addition rate due to surface growth,  $\left(\frac{dC}{dt}\right)_{SG}^{SG}$ , as a function of height above the burner (HAB) for Models I–V at burner-to-stagnation plate separation ( $H_p$ ) of 8 mm.

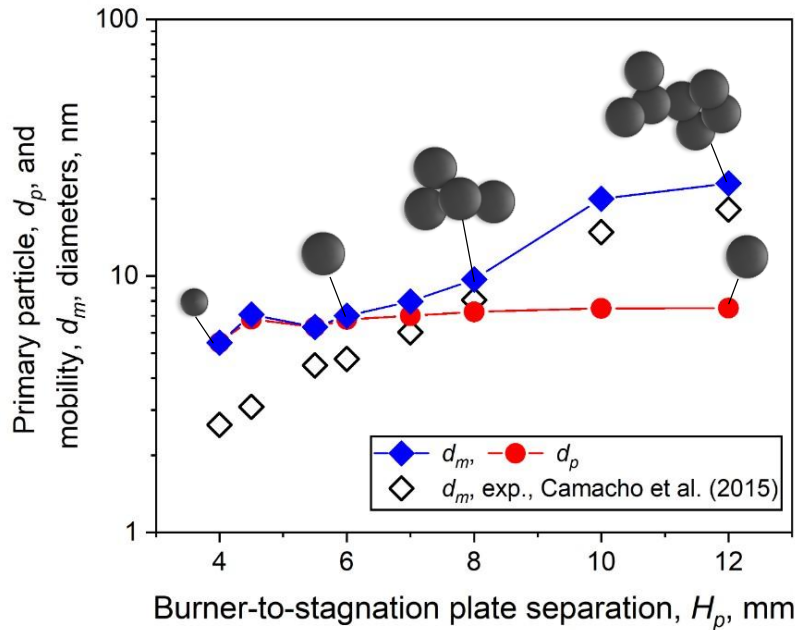

Figure S2: Soot primary particle diameter,  $d_p$  (circles), and mobility diameter,  $d_m$  (filled diamonds) obtained by Model II as a function of  $H_p$ . The results are compared to the number-based average  $d_m$  obtained by scanning mobility particle sizer measurements in premixed ethylene flames (Camacho et al., 2015). Up to  $H_p \approx 6$  mm, the PD-CFD-derived  $d_p$  and  $d_m$  are practically identical, indicating that particles remain nearly spherical. At  $H_p > 6$  mm,  $d_m$  increases while  $d_p$  remains nearly constant, reflecting the transition from spherical particles to fractal-like agglomerates.

## References

Camacho, J., Liu, C., Gu, C., Lin, H., Huang, Z., Tang, Q., You, X., Saggese, C., Li, Y., Jung, H., Deng, L., Wlokas, I., and Wang, H.: Mobility size and mass of nascent soot particles in a benchmark premixed ethylene flame, *Combustion and Flame*, 162, 3810–3822, <https://doi.org/10.1016/j.combustflame.2015.07.018>, 2015.
